# Supplementary material
Source: publisher figshare collection journal article supplement (https://frontiersin.figshare.com/ndownloader/files/25353542)
Supplement: Supplementary file 1 [file 25353542]

***Supplementary Material***  
***Including parameter uncertainty in an***  
***intercomparison of physically-based snow models***

**1 SUPPLEMENTARY TABLES AND FIGURES**

Table S1: Perturbed model parameters and their ranges, adapted from (Günther et al., 2019). *Model configuration* indicates which parameter is used by which model options. Four parameters are used by all model configurations (*all*), all other parameters are either used by option 1 or 2 for the model switches for albedo evolution (*am*), thermal conductivity (*cm*), snow densification (*dm*), correction for atmospheric stability (*em*), and liquid water transport in the snowpack (*hm*)

| source         | unit                              | description                                | model configuration | range (min-max) | reference                                  |
|----------------|-----------------------------------|--------------------------------------------|---------------------|-----------------|--------------------------------------------|
| $z_{0s}$       | m                                 | roughness length of snow-covered ground    | all                 | 0.001-0.0168    | Helgason and Pomeroy (2011); Moore (1983)  |
| $\alpha_{max}$ | -                                 | maximum albedo for fresh snow              | all                 | 0.75 – 0.95     | Singh and Singh (2001)                     |
| $\alpha_{min}$ | -                                 | minimum albedo for aged snow               | all                 | 0.5 – 0.6       | Pomeroy and Brun (2001)                    |
| $h_f$          | m                                 | snow cover fraction depth scale            | all                 | 0.05 – 0.2      | no reference                               |
| $T_\alpha$     | °C                                | albedo decay temperature threshold         | am=0                | -4 – -0.1       | no reference                               |
| $S_\alpha$     | kg m <sup>-2</sup>                | snowfall required to refresh albedo        | am=1                | 1 – 10          | Wang et al. (2013); Douville et al. (1995) |
| $\tau_{cold}$  | h                                 | cold snow albedo decay timescale           | am=1                | 750 – 1250      | no reference                               |
| $\tau_{melt}$  | h                                 | melting snow albedo decay timescale        | am=1                | 50 – 150        | no reference                               |
| $\lambda_0$    | W m <sup>-1</sup> K <sup>-1</sup> | fixed thermal conductivity                 | cm=0                | 0.105 – 0.699   | Sturm et al. (2002)                        |
| $b_\lambda$    | -                                 | thermal conductivity exponent              | cm=1                | 1.9 – 2.1       | no reference                               |
| $\rho_0$       | kg m <sup>-3</sup>                | fixed snow density                         | dm=0                | 208 – 306       | range of mean annual density recordings    |
| $\rho_f$       | kg m <sup>-3</sup>                | fresh snow density                         | dm=1                | 70 – 190        | Pomeroy and Gray (1995)                    |
| $\rho_{cold}$  | kg m <sup>-3</sup>                | maximum density for cold snow              | dm=1                | 200 – 400       | Singh and Singh (2001)                     |
| $\rho_{melt}$  | kg m <sup>-3</sup>                | maximum density for melting snow           | dm=1                | 400 – 650       | Singh and Singh (2001)                     |
| $\tau_p$       | h                                 | compaction timescale                       | dm=1                | 100 – 300       | no reference                               |
| $b_h$          | -                                 | atmospheric stability adjustment parameter | em=1                | 4 – 6           | Louis et al. (1982) b=5                    |
| $W_{irr}$      | %                                 | irreducible liquid water content           | hm=1                | 3 – 8           | Singh and Singh (2001)                     |

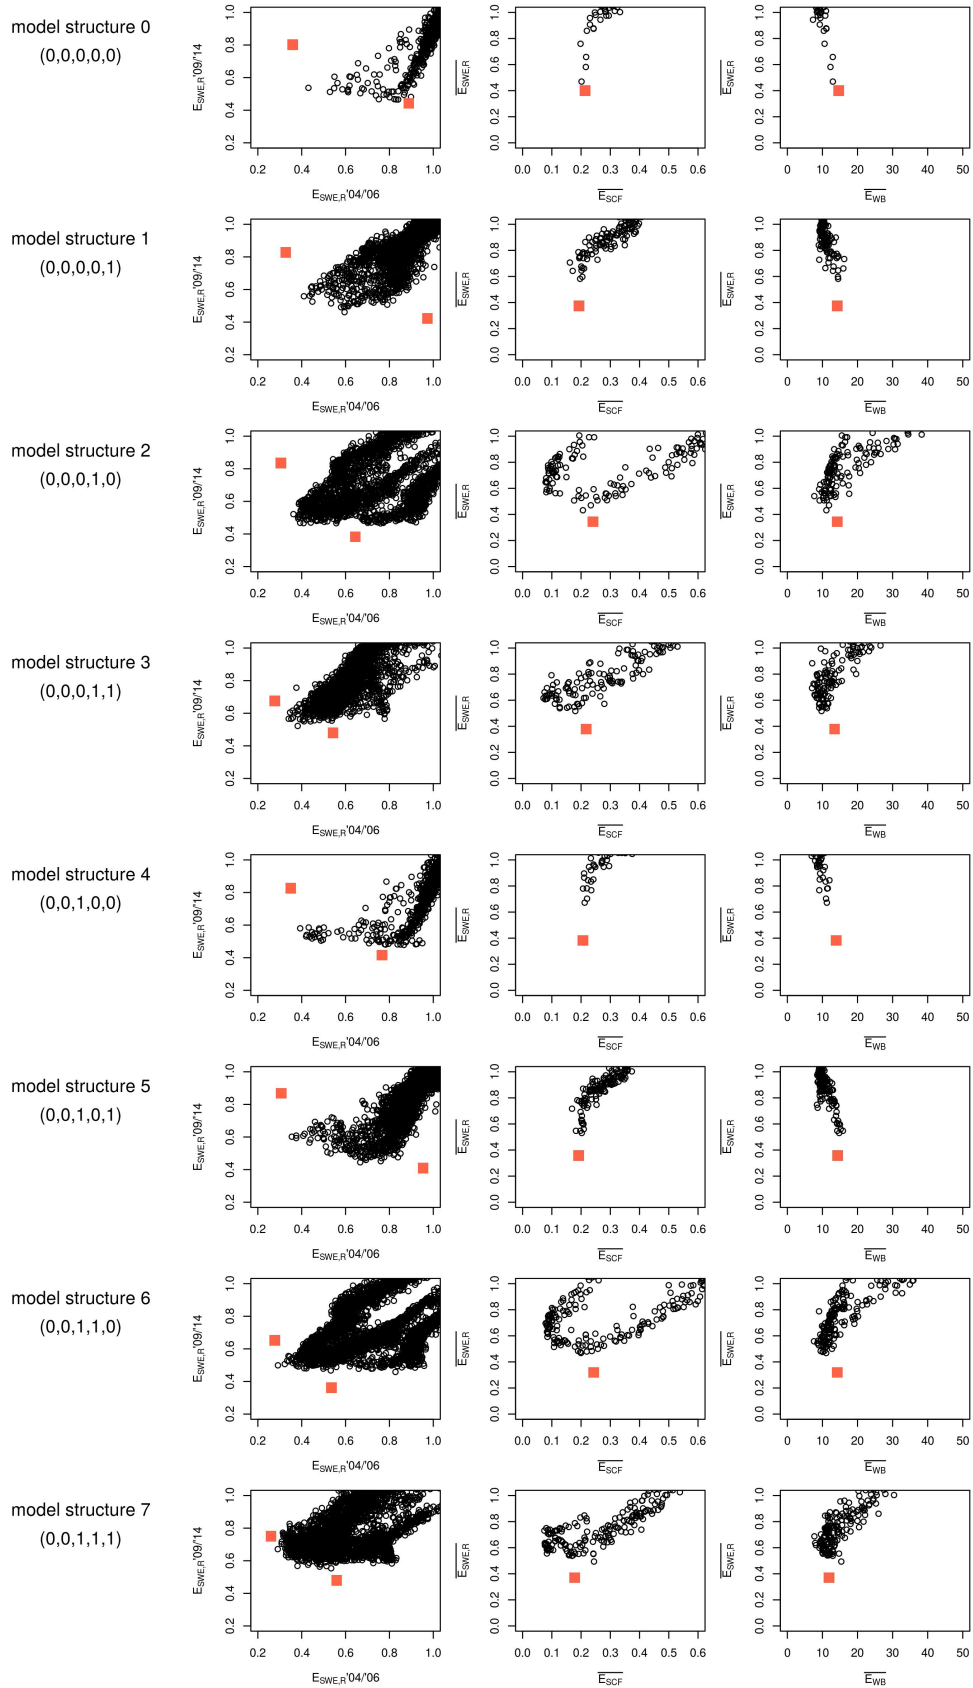

model structure 8  
(0,1,0,0,0)

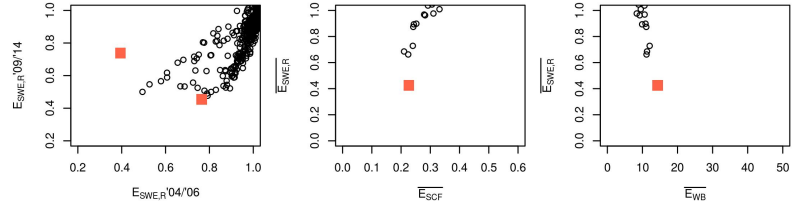

model structure 9  
(0,1,0,0,1)

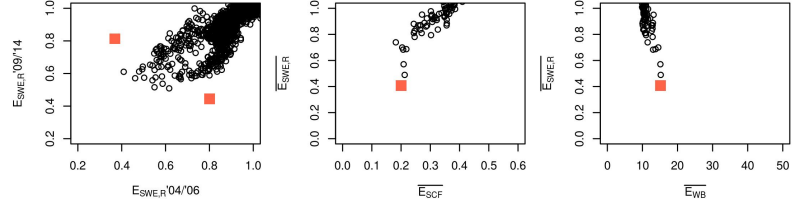

model structure 10  
(0,1,0,1,0)

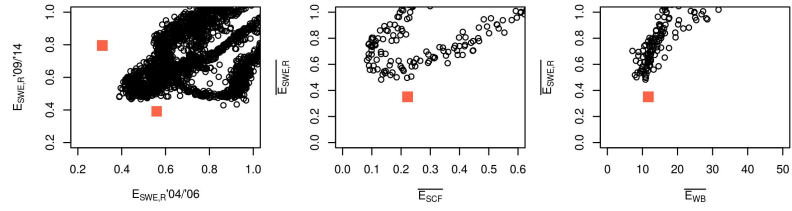

model structure 11  
(0,1,0,1,1)

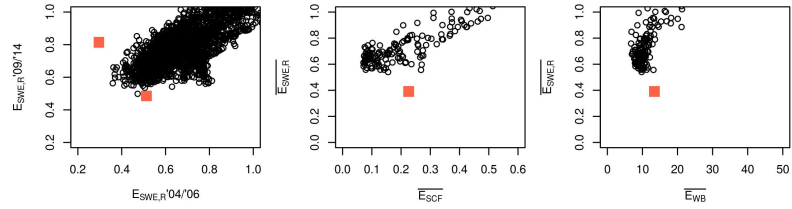

model structure 12  
(0,1,1,0,0)

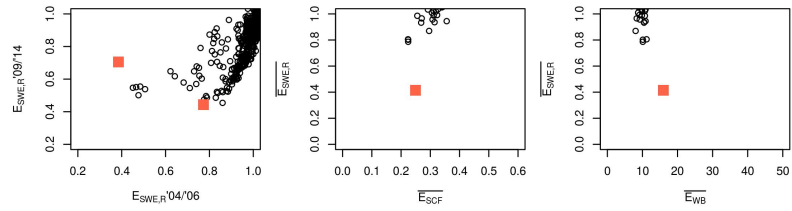

model structure 13  
(0,1,1,0,1)

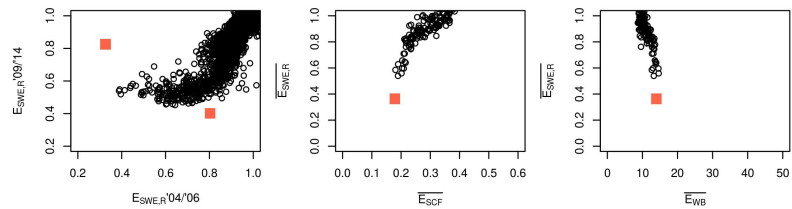

model structure 14  
(0,1,1,1,0)

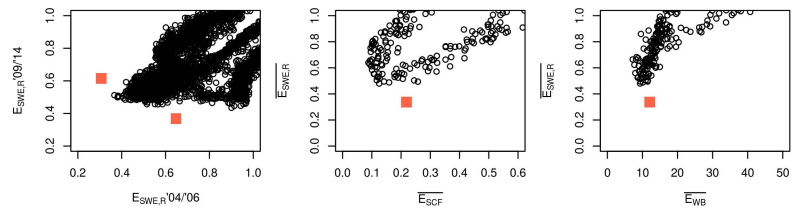

model structure 15  
(0,1,1,1,1)

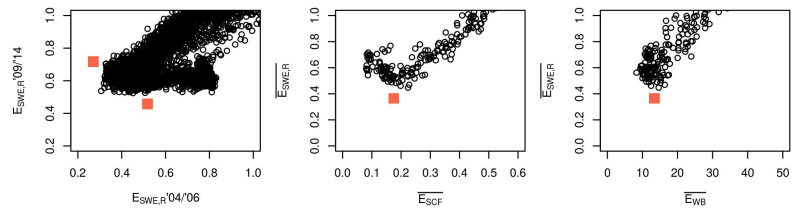

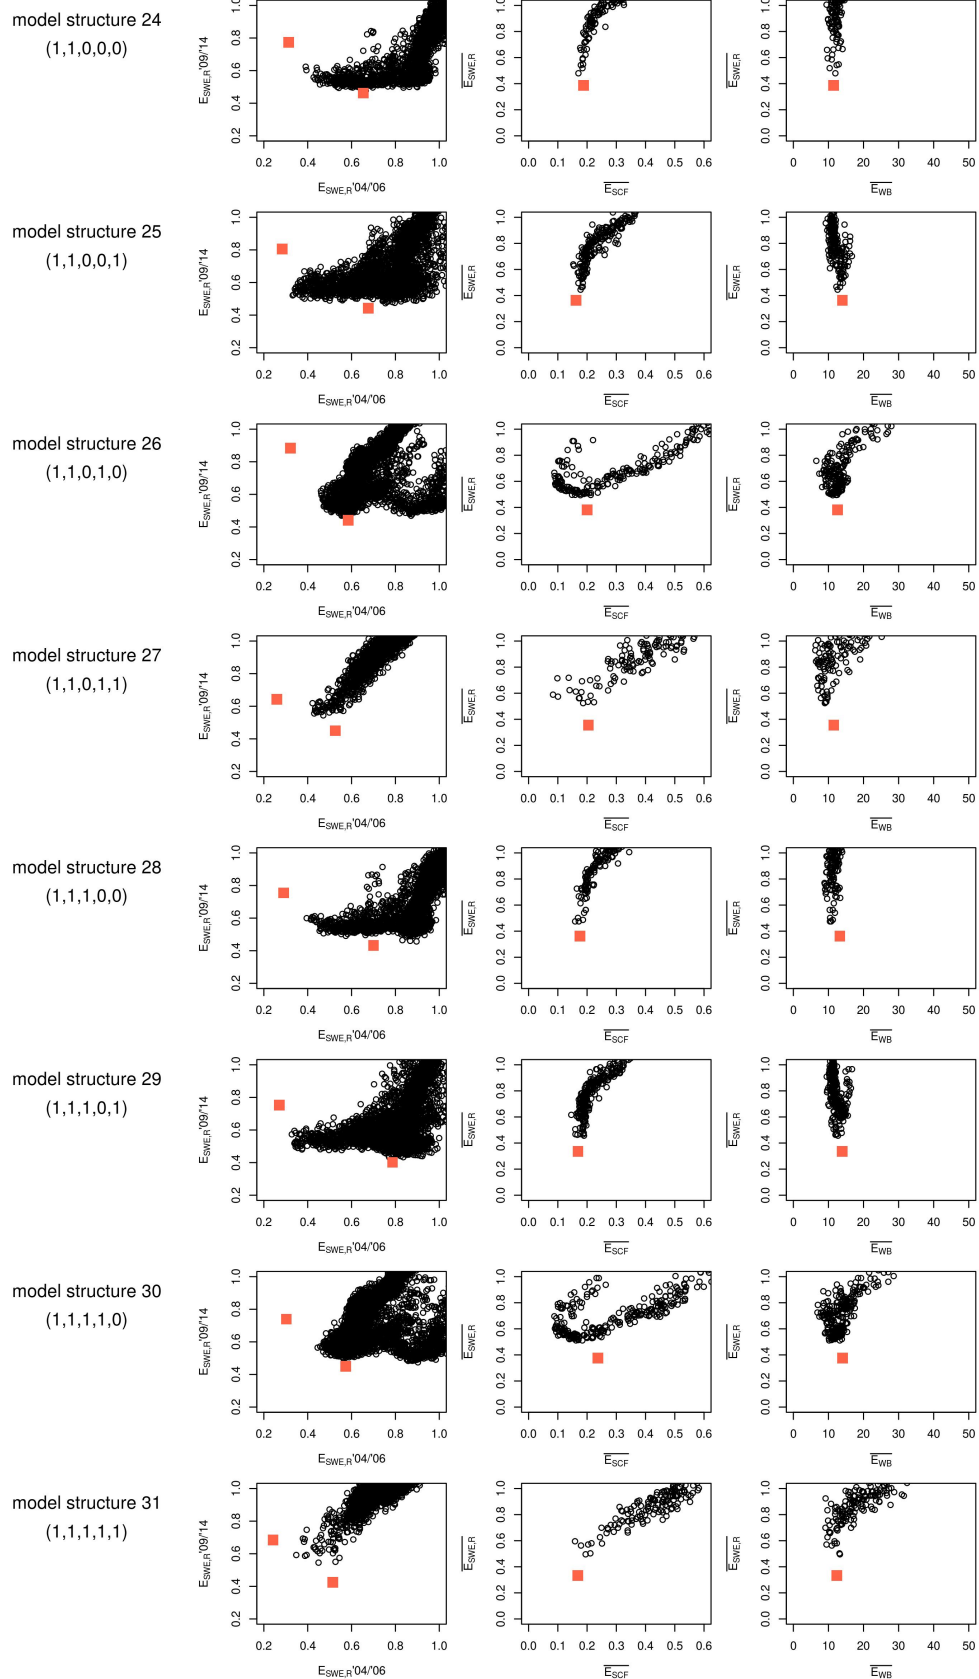

model structure 16  
(1,0,0,0,0)

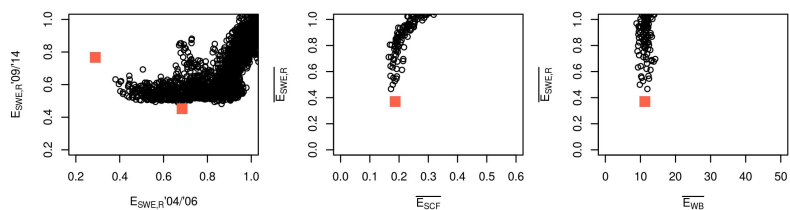

model structure 17  
(1,0,0,0,1)

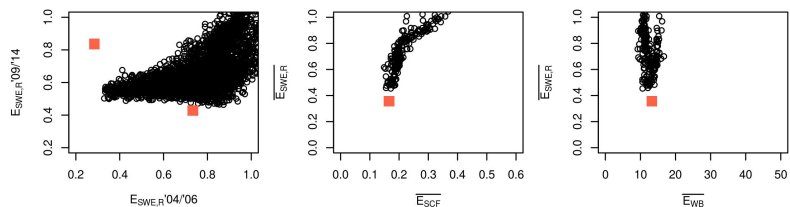

model structure 18  
(1,0,0,1,0)

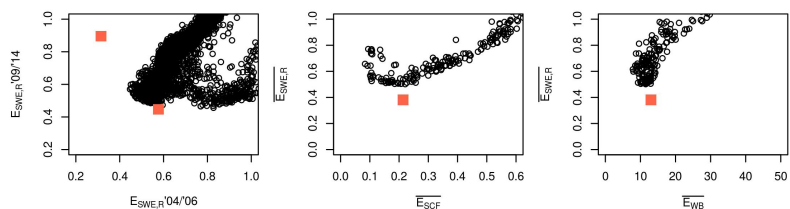

model structure 19  
(1,0,0,1,1)

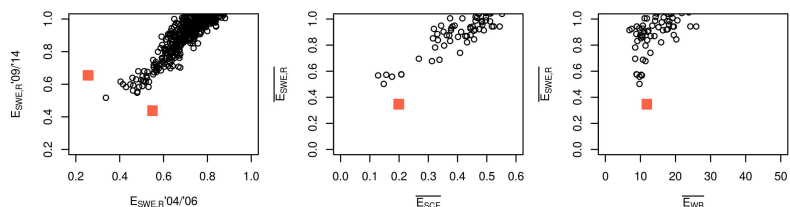

model structure 20  
(1,0,1,0,0)

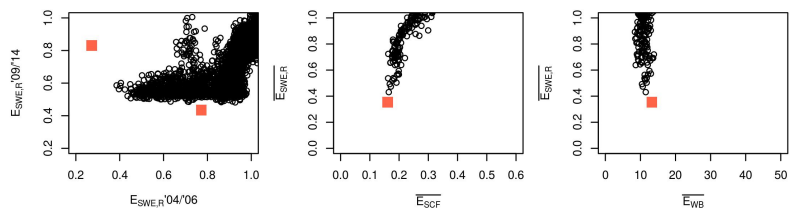

model structure 21  
(1,0,1,0,1)

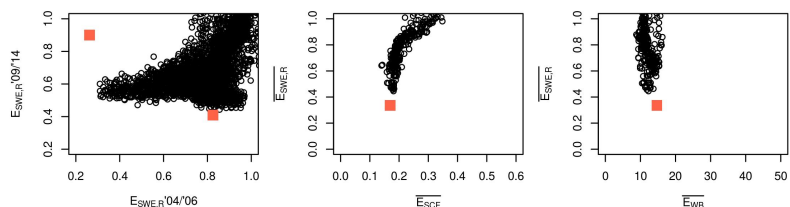

model structure 22  
(1,0,1,1,0)

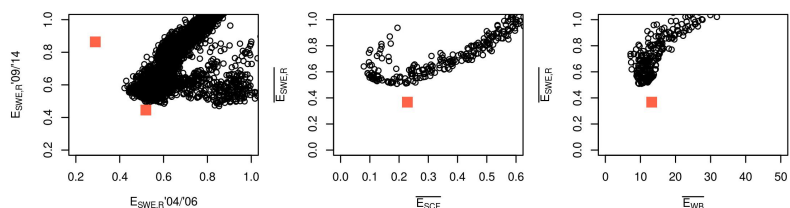

model structure 23  
(1,0,1,1,1)

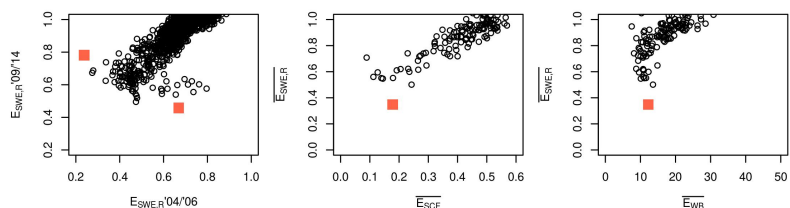

Figure S1: Model errors for point-scale snow water equivalent and snowpack runoff predictions in period 1 (2004/2006) against model skill in period 2 (2009/2014) (left column). Mean point-scale model errors (average errors from period 1 and period 2) against mean errors for catchment snow cover fraction (center column). Mean point scale model errors against mean errors for catchment spring water balance (right column). Black circles encompass model responses for a part of the parameter space as sampled from a latin hypercube. Red squares indicate evaluation errors when parameters have been calibrated at the point-scale. Each row represents one model structure with the corresponding model options indicated to the left of each row. The binary vector shows the option choice (0 or 1) for the five model switches for the albedo evolution, thermal conductivity, snow densification, correction for atmospheric stability and the liquid water transport in the snowpack.

## REFERENCES

- Douville, H., Royer, J., and Mahfouf, J. (1995). A new snow parameterization for the Meteo-France climate model. *Climate Dynamics* 35, 21–35. doi:10.1007/BF00208760
- Günther, D., Marke, T., Essery, R., and Strasser, U. (2019). Uncertainties in Snowpack Simulations—Assessing the Impact of Model Structure, Parameter Choice, and Forcing Data Error on Point-Scale Energy Balance Snow Model Performance. *Water Resources Research* 55, 2779–2800. doi:10.1029/2018WR023403
- Helgason, W. and Pomeroy, J. W. (2011). Characteristics of the Near-Surface Boundary Layer within a Mountain Valley during Winter. *Journal of Applied Meteorology and Climatology* 51, 583–597. doi:10.1175/JAMC-D-11-058.1
- Louis, J.-F., Tiedtke, M., and Geleyn, J.-F. (1982). A short history of the PBL parameterization at ECMWF. In *Workshop on Planetary Boundary Layer parameterization, 25-27 November 1981* (Shinfield Park, Reading: ECMWF), 59–79
- Moore, R. D. (1983). On the Use of Bulk Aerodynamic Formulae Over Melting Snow. *Hydrology Research* 14, 193–206. doi:10.2166/nh.1983.0016
- Pomeroy, J. W. and Brun, E. (2001). Physical Properties of Snow. In *SpringerReference* (Berlin/Heidelberg: Springer-Verlag). 45–126. doi:10.1007/SpringerReference{\\_}225906
- Pomeroy, J. W. and Gray, D. M. (1995). *Snowcover Accumulation, Relocation and Management* (Canada Communication Group Pub)
- Singh, P. and Singh, V. (2001). *Snow and glacier hydrology* (Dordrecht: Kluwer Academic Publishers), 6th edn.
- Sturm, M., Perovich, D. K., and Holmgren, J. (2002). Thermal conductivity and heat transfer through the snow on the ice of the Beaufort Sea. *Journal of Geophysical Research* 107, 8043. doi:10.1029/2000JC000409
- Wang, L., MacKay, M., Brown, R., Bartlett, P., Harvey, R., and Langlois, A. (2013). Application of Satellite Data for Evaluating the Cold Climate Performance of the Canadian Regional Climate Model over Québec, Canada. *Journal of Hydrometeorology* 15, 614–630. doi:10.1175/JHM-D-13-086.1
